# Supplementary material for: Occupational therapy interventions for adults with severe mental illness: a scoping review
Source: HighWire-hosted journal article supplement (doi:10.1136/bmjopen-2020-047467), 2021-10-01
Supplement: bmjopen-2020-047467supp001_data_supplement.pdf [file bmjopen-2020-047467supp001_data_supplement.pdf]

**Supplementary table 1.** Characteristics of the studies included in this scoping review.

| Author., year                 | Design | Sample (n), country                           | Intervention/<br>Evaluation                                   | Main results <sup>a</sup>                                                                                                                                                                                    | Limitations                                                                                                                               |
|-------------------------------|--------|-----------------------------------------------|---------------------------------------------------------------|--------------------------------------------------------------------------------------------------------------------------------------------------------------------------------------------------------------|-------------------------------------------------------------------------------------------------------------------------------------------|
| Schindler et al. [45], 1999   | nRCT   | 36, United States<br>Loss to follow up (n=11) | Psychosocial intervention/<br>Pre- and post- evaluation       | Significant improvement in scores of patients in the activity IG (p=0.002) vs the discussion IG and CG.<br>Participants in CG showed a non-significant decline in social interaction.                        | Small sample size, short duration of the study, differing numbers of participants within the groups.                                      |
| Shellwood et al. [20], 1999   | RCT    | 75, UK<br>Loss to follow up (n=10)            | Psychosocial intervention/<br>Pre- and post- evaluation       | Decrease in socially embarrassing behavior in IG vs CG (p=0.03)<br>Improve in interpersonal functioning and recreational activities in IG vs CG (p<0.01)<br>Decrease in suspiciousness in IG vs CG (p=0.016) | Small sample size, short follow-up period, patients without family support suffered persistent symptoms that made intervention difficult. |
| Hadas-Lidor et al. [21], 2001 | RCT    | 72, Israel<br>Loss to follow up (n=14)        | Cognitive intervention/<br>Pre-, post- and 6-month evaluation | Higher memory indices (p<0.001), thought indices (p<0.001), work status (p<0.001), and residence status (p<0.05) in IG vs CG.                                                                                | Self-reported questionnaires for instrumental ADLs and self-concept.                                                                      |
| Wu et al. [46], 2001          | nRCT   | 116, Taiwan<br>Loss to follow up (n=17)       | Psychosocial intervention/<br>Pre- and post- evaluation       | There was a marginal significant improvement in the main effect of the IG (p=0.056) vs CG, as well as in the interaction between the IG and the motivation types (p=0.081).                                  | Limitations in the psychometric properties of the instruments used, decreased internal validity of the study due to participant dropouts. |
| Wykes et al. [22], 2002       | RCT    | 18, UK<br>Loss to follow up (n=0)             | Cognitive intervention/<br>Pre- and post- evaluation          | Functional magnetic resonance indicates that cognitive remediation therapy in IG had significantly increased brain activation in regions associated with working memory (p=0.026) vs CG.                     | Small sample size, only male participants, highly disabled participants, study results are not generalizable.                             |
| Brown et al. [47], 2006       | nRCT   | 59, United States                             | Exercise intervention/<br>Pre- and post- evaluation           | Improve on behavioral measures in IG vs CG (p=0.05). Increase in weight loss (2.7 kg/6 lbs) in IG vs increase in weight gain (0.5 kg/lb) in CG.                                                              | Small sample size, non-randomized study, study results not generalizable.                                                                 |

|                           |       |                                                                   |                                                                                                      |                                                                                                                                                                                                                                                 |                                                                                                               |
|---------------------------|-------|-------------------------------------------------------------------|------------------------------------------------------------------------------------------------------|-------------------------------------------------------------------------------------------------------------------------------------------------------------------------------------------------------------------------------------------------|---------------------------------------------------------------------------------------------------------------|
| Choi et al. [23], 2006    | RCT   | Loss to follow up (n=23)<br>34, Korea<br>Loss to follow up (n=16) | Cognitive intervention/<br>Pre- and post- evaluation                                                 | Increase in social behavior in IG vs CG (p<0.05).                                                                                                                                                                                               | Small sample size, high dropout rate in initial participants, heterogeneous sample                            |
| McInnis et al. [35], 2006 | Quasi | 15, UK<br>Loss to follow up (n=1)                                 | Psychoeducational intervention/<br>Pre- and post- evaluation                                         | Increase in insight in all participants after the intervention (p=0.048).                                                                                                                                                                       | Small sample size, no follow-up data was collected, no comparison with a control group.                       |
| Schene et al. [24], 2006  | RCT   | 62, Netherlands<br>Loss to follow up (n=14)                       | Psychoeducational intervention/<br>Pre-, post-, 3- 6- and 12-month evaluation and 42-month follow up | The intervention did not improve depression outcome.<br>Significant increase for work resumption in both groups in months 0–18 (p=0.001) but non-significant for months 19–42 (p=0.387).                                                        | Small sample size, limited amount of follow-up data, limited contact between TAU and OT staff.                |
| Chan et al. [25], 2007    | RCT   | 81, China<br>Loss to follow up (n=0)                              | Psychoeducational intervention/<br>Pre-, post- and 12-month evaluation                               | Increase in perceived health in IG vs CG: perception (p=0.033), physical health component (p=0.004) and mental health component (p<0.0001).<br>Lower hospital readmission rate in IG vs CG, it was approximately 1.75 times greater for the CG. | Small sample size, sample was only composed of men.                                                           |
| Dunn et al. [36], 2008    | Quasi | 178, United States<br>Loss to follow up (n=29)                    | Psychoeducational intervention/<br>Pre-, post- and 6-12-month evaluation                             | Significant improvement in the educational programs' engagement in IG (p=0.35) vs in CG at the 6-month assessment point, although it did not reach statistical significance (p=0.13) at the 12-month assessment point.                          | Lack of randomization, loss of individuals to follow-up, low course attendance.                               |
| Tetlie et al. [37], 2008  | Quasi | 15, Norway<br>Loss to follow up (n=2)                             | Exercise intervention/<br>Pre- and post- evaluation                                                  | Increase in well-being and safety in all participants after the intervention (p value not shown)                                                                                                                                                | Small sample size, heterogeneous sample, no comparison with a control group, study results not generalizable. |

|                           |         |                                           |                                                                            |                                                                                                                                                                                                                                                                    |                                                                                                                                                            |
|---------------------------|---------|-------------------------------------------|----------------------------------------------------------------------------|--------------------------------------------------------------------------------------------------------------------------------------------------------------------------------------------------------------------------------------------------------------------|------------------------------------------------------------------------------------------------------------------------------------------------------------|
|                           |         |                                           |                                                                            | Improve in resting heart rate and systolic blood pressure in all participants after the intervention (p value not shown)                                                                                                                                           |                                                                                                                                                            |
| Rouleau et al. [50], 2009 | Pilot-Q | 26, Canada<br>Loss to follow up (n=0)     | Psychosocial intervention/<br>Pre-, post- and 3-month evaluation           | Higher scores on visual attention (p=0.02), verbal learning (p=0.02) and integration to work (p=0.003) in IG vs CG.<br>Lower negative (p=0.017) and general symptoms (p=0.018) in IG vs CG.<br>Increase in the ability to store information (p=0.034) in CG vs IG. | Small sample size, absence of a comparison group at week 30, lack of randomization.                                                                        |
| Castle et al. [26], 2010  | RCT     | 84, Australia<br>Loss to follow up (n=12) | Psychoeducational intervention/<br>Pre-, post-, 3- and 12-month evaluation | There were no significant between-group differences in depressive or maniac symptoms.                                                                                                                                                                              | Non-blinding study, the questioned suitability of the MADRS for assessing bipolar depression.                                                              |
| Edgelow et al. [51], 2011 | Pilot   | 24, Canada<br>Loss to follow up (n=6)     | Psychoeducational intervention/<br>Pre- and post- evaluation               | Increase in the occupational balance in IG vs CG (p=0.05) by spending an average of 47 min more per day in activity.                                                                                                                                               | Small sample size, decreased internal validity of the study due to differential dropout rates of the groups, inability to complete the follow-up measures. |
| Jahn et al. [27], 2011    | RCT     | 122, Germany<br>Loss to follow up (n=26)  | Psychoeducational intervention/<br>Pre-, post-, 1- and 9-month evaluation  | No significant differences were found between IG and CG.<br>Symptom improvement in both groups after the intervention (p<0.001).<br>Increase in mean knowledge of the illness in both groups after the intervention (p<0.001).                                     | Non-blinding study, high dropout rate in initial participants.                                                                                             |
| Berking et al. [28], 2012 | RCT     | 432, Germany<br>Loss to follow up (n=57)  | Cognitive intervention/<br>Pre- and post- evaluation                       | Significant time-group interaction in IG (p=0.03) vs CG.<br>Significant time effects in all subscales' scores of the ERSQ (p<0.001) in IG vs CG, decreasing                                                                                                        | Self-reported questionnaires, non-evaluation of quantitative data on the integrity and compliance with treatment protocols.                                |

|                              |         |                                            |                                                                            |                                                                                                                                                                                   |                                                                                                                                       |
|------------------------------|---------|--------------------------------------------|----------------------------------------------------------------------------|-----------------------------------------------------------------------------------------------------------------------------------------------------------------------------------|---------------------------------------------------------------------------------------------------------------------------------------|
|                              |         |                                            |                                                                            | depression symptoms and increasing well-being and emotion regulation skills.                                                                                                      |                                                                                                                                       |
| Foruzandeh et al. [52], 2012 | Pilot   | 76, Iran<br>Loss to follow up (n=16)       | Psychosocial intervention/<br>Pre- and post- evaluation                    | Lower positive (p<0.001) and negative symptoms (p<0.001) in IG vs CG.                                                                                                             | Small sample size.                                                                                                                    |
| Tanaka et al. [53], 2014     | Pilot-Q | 46, Japan<br>Loss to follow up (n=7)       | OT intervention/<br>Pre-, post- and 1-month evaluation                     | Increase in FIM cognitive (p=0.012) and total (p=0.016) scores in IG vs CG.                                                                                                       | Small sample size, non-blinding study, short follow-up period, study conducted in a single hospital, study results not generalizable. |
| Ming-De et al. [38], 2016    | Quasi   | 45, China<br>Loss to follow up (n=9)       | Cognitive intervention/<br>Pre- and post- evaluation                       | There were no significant between-group differences but the data showed medium effect sizes that favored the IG in regard to processing speed, memory and the executive function. | Small sample size, lack of randomization, non-blinding study.                                                                         |
| Vizzotto et al. [54], 2016   | Pilot   | 30, Brazil<br>Loss to follow up (n=5)      | Psychosocial intervention/<br>Pre- and post- evaluation                    | Higher scores on food preparation (p=0.002) and general autonomy (p=0.008) in IG vs CG.                                                                                           | Small sample size, low IQ levels of the subjects in the sample.                                                                       |
| Buschert et al. [29], 2017   | RCT     | 38, Germany<br>Loss to follow up (n=8)     | Exercise intervention/<br>Pre- and post- evaluation                        | Significant improvements of short-term memory (p=0.01) and alertness (p=0.02) in IG vs CG.<br>Decrease of depressive symptoms in both groups (p=0.001)                            | Small sample size, low duration and intensity of both treatments, different group sizes.                                              |
| Eklund et al. [30], 2017     | RCT     | 226, Sweden<br>Loss to follow up (n=46)    | Psychosocial intervention/<br>Pre-, post- and 6-month follow-up evaluation | Increase in participation (p<0.001), activity level (p=0.03), activity balance (p<0.04), severity of symptoms (p<0.02) and the level of functioning (p<0.05) in IG vs CG.         | Exact participation rate not calculated, non-blinding study, higher dropout rate in the IG.                                           |
| Pos et al. [31], 2017        | RCT     | 50, Netherlands<br>Loss to follow up (n=7) | Cognitive intervention/<br>Pre-, post- evaluation                          | No significant differences were found between IG and CG.<br>Negative affect showed a weaker association with paranoid ideation post-treatment in IG (p<0.001) vs CG.              | Small sample size, results partly confined by baseline differences.                                                                   |

|                                      |       |                                         |                                                                                               |                                                                                                                                                                                                                                                                                                                 |                                                                                                                                         |
|--------------------------------------|-------|-----------------------------------------|-----------------------------------------------------------------------------------------------|-----------------------------------------------------------------------------------------------------------------------------------------------------------------------------------------------------------------------------------------------------------------------------------------------------------------|-----------------------------------------------------------------------------------------------------------------------------------------|
| Kaizerman-Dinerman et al. [48], 2018 | nRCT  | 94, Israel<br>Loss to follow up (n=10)  | Cognitive intervention/<br>Pre-, post- and 6-week follow-up evaluation                        | Increase in performance, participation and daily functions (p<0.001) in IG vs CG.                                                                                                                                                                                                                               | Non-randomized study, the IG received more therapy time, which may influence the validity of the study.                                 |
| Shimada et al. [32], 2018            | RCT   | 136, Japan<br>Loss to follow up (n=7)   | Psychosocial intervention/<br>Pre- and post- or 3 months following hospitalization evaluation | Increase in verbal memory (p<0.01), working memory (p=0.02), verbal fluency (p<0.01), attention (p<0.01), cognition (p<0.02), enjoyment (p<0.01), usefulness (p<0.01), perceived choice (p<0.01), intrinsic motivation (p<0.01), medication adherence(p<0.01) and in client satisfaction (p <0.01) in IG vs CG. | Non-blinding study, there was no evaluation of long-term effects during hospitalization and the number of OT sessions was not measured. |
| Singh et al. [39], 2018              | Quasi | 20, India<br>Loss to follow up (n=0)    | Psychoeducational intervention/<br>Pre- and post- evaluation                                  | Increase in all subscales' scores of the self-prepared social skills checklist in all participants after intervention (p<0.0001)<br>Increase in all subscales scores of Social-occupational functioning scale in all participants after intervention (p<0.0001)                                                 | Small sample size, short follow-up period, no comparison with a control group, only male participants.                                  |
| Kim et al. [40], 2019                | Quasi | 20, Korea<br>Loss to follow up (n=0)    | Psychosocial intervention/<br>Pre- and post- evaluation                                       | Higher scores on the executive functions test (p<0.001) and the instrumental ADL test (p<0.05) in IG vs CG.                                                                                                                                                                                                     | Small sample size, non-blinding study, the study results are not generalizable.                                                         |
| Argentzell et al. [41], 2020         | Quasi | 226, Sweden<br>Loss to follow up (n=46) | Psychosocial intervention/<br>Pre-, and post- evaluation                                      | No significant improvement on recovery main effect and interaction was found between both groups.                                                                                                                                                                                                               | Exact participation rate not calculated, decreased external validity, no clear cause and effect.                                        |
| Gökçen et al. [33], 2020             | RCT   | 36, Turkey<br>Loss to follow up (n=4)   | Exercise intervention/<br>Pre- and post- evaluation                                           | Improve in negative symptoms and general psychopathology in IG vs CG (p<0.001)<br>Increase in social functioning in IG vs CG (p=0.021)                                                                                                                                                                          | Small sample size, no follow-up data was collected, absence of an active comparison group, the study results are not generalizable      |
| Mashimo et al. [34], 2020            | RCT   | 60, Japan<br>Loss to follow up (n=0)    | Psychosocial intervention/<br>Pre-, and post- evaluation                                      | Increase in social functioning in both groups (p<0.001).<br>Increase in social functioning in IG vs CG (p=0.019).                                                                                                                                                                                               | Non-blinding study, no psychiatric symptoms collected, short duration of the intervention.                                              |

|                             |       |                                              |                                                                      |                                                                                                                                                                                                    |                                                                                                                              |
|-----------------------------|-------|----------------------------------------------|----------------------------------------------------------------------|----------------------------------------------------------------------------------------------------------------------------------------------------------------------------------------------------|------------------------------------------------------------------------------------------------------------------------------|
| Ramano et al. [42], 2020    | Quasi | 100, South Africa<br>Loss to follow up (n=0) | Psychosocial intervention/<br>Pre- and post- evaluation              | Increase in social interaction in both groups, being significant for the IG (p<0.004).<br>88% of the IG participants reported improvements in social functioning vs to 78% of the CG participants. | Non-blinding study, short duration of the program, no follow-up data was collected, the study results are not generalizable. |
| Shinozaki et al. [43], 2020 | Quasi | 117, Japan<br>Loss to follow up (n=0)        | Psychoeducational intervention/<br>Pre- and post- evaluation         | Increase in subjective well-being in all participants after the intervention (p<0.001)<br>Improvement in the attitude of patients towards the drugs used in their treatment (p = 0.002)            | Absence of a comparison group, short duration of the program.                                                                |
| Yilmaz et al. [49], 2020    | nRCT  | 100, Turkey<br>Loss to follow up (n=36)      | Psychosocial intervention/<br>Pre- and post- evaluation              | Lower clinical symptoms in PSST IG vs CMHC IG (p=0.01)<br>Increase in social functioning in IGs vs CG (p =0.01).                                                                                   | Small sample size, non-blinding study, short follow-up period.                                                               |
| Wasmuth et al. [44], 2021   | Quasi | 27, United States<br>Loss to follow up (n=0) | Psychoeducational intervention/<br>Pre-, 6-week and post- evaluation | Increase in IG total OCAIRS scores (p<0.001).<br>No significant differences between IG and CG were found.                                                                                          | Small sample size, OCAIRS only used in IG.                                                                                   |

ADL: activities of daily living; CG: control group; IG: intervention group; IQ: Intellectual Quotient; nRCT: non-randomized controlled trial; Pilot: Pilot study of a RCT; Pilot-Q: Pilot study of a Quasi; Quasi: Quasi-experimental study; RCT: randomized controlled trial; vs: versus. <sup>a</sup>We indicate results where there were statistically significant differences between IG vs CG at significance level of p<0.05.
